# Supplementary material for: Water-soluble gold nanoparticles based on imidazolium gemini amphiphiles incorporating piroxicam
Source: Royal Society of Chemistry journal article supplement (doi:10.1039/c3ra44578j), 2014-01-01
Supplement: c3ra44578j.pdf [file c3ra44578j.pdf]

## Supplementary Information

### Water-soluble gold nanoparticles based on imidazolium gemini amphiphiles for delivery of piroxicam

Mafalda Rodrigues,<sup>ab</sup> Anna C. Calpena,<sup>bc</sup> David B. Amabilino,<sup>d</sup> David Ramos-Lopez,<sup>e</sup> Joaquin de Lapuente<sup>e</sup> and Lluïsa Pérez-García\*<sup>ab</sup>

<sup>a</sup> *Department of Pharmacology and Therapeutic Chemistry, Universitat de Barcelona, 08028 Barcelona, Spain. Fax: +34 934024539, Tel: +34 934035849, E-mail: [mlperez@ub.edu](mailto:mlperez@ub.edu)*

<sup>b</sup> *Institute of Nanoscience and Nanotechnology IN2UB, Universitat de Barcelona, 08028 Barcelona, Spain.*

<sup>c</sup> *Department of Pharmacy and Pharmaceutical Technology, Universitat de Barcelona, 08028 Barcelona, Spain.*

<sup>d</sup> *Institut de Ciència de Materials de Barcelona (ICMAB-CSIC), Campus Universitari, 08193 Bellaterra, Spain.*

<sup>e</sup> *Unitat de Toxicologia Experimental i Ecotoxicologia (UTOX-PCB), Baldiri i Reixac 10-12, 08028 Barcelona, Spain.*

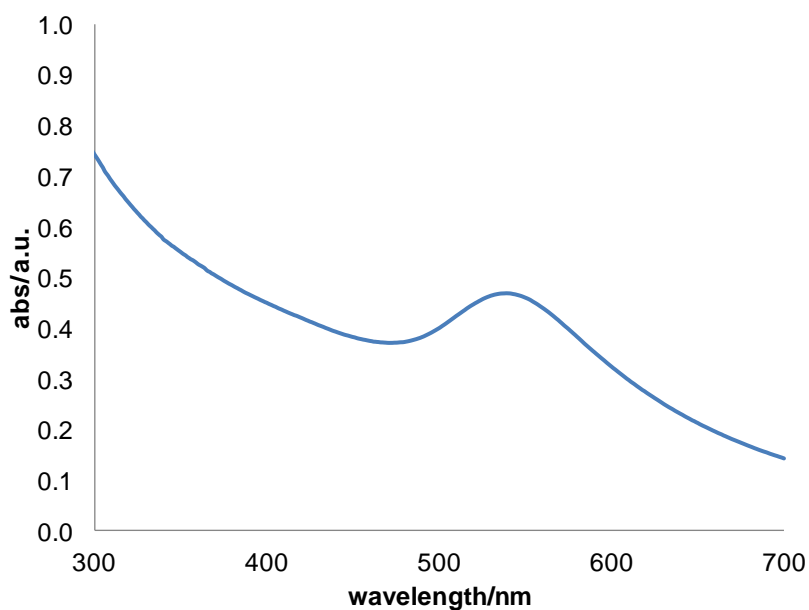

Figure S1: UV-vis spectra of **1•GNP**, showing the typical SPR peak around 533 nm.

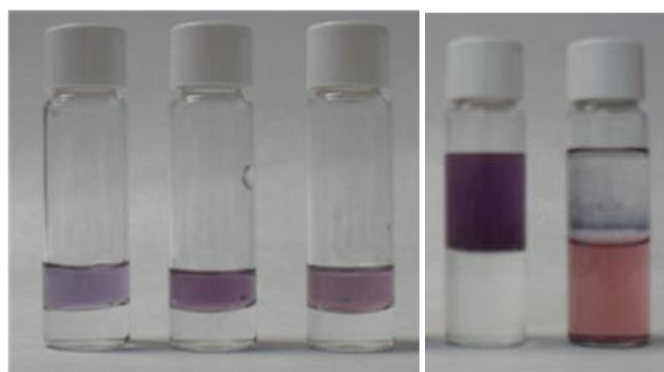

Figure S2: From left to right: GNP from experiments 2 to 4 (in Table 1) in aqueous phase (organic dichloromethane phase below without any GNP). GNP from experiment 4 (after centrifugation to concentrate them) and from experiment 1 (transferred to organic dichloromethane phase).

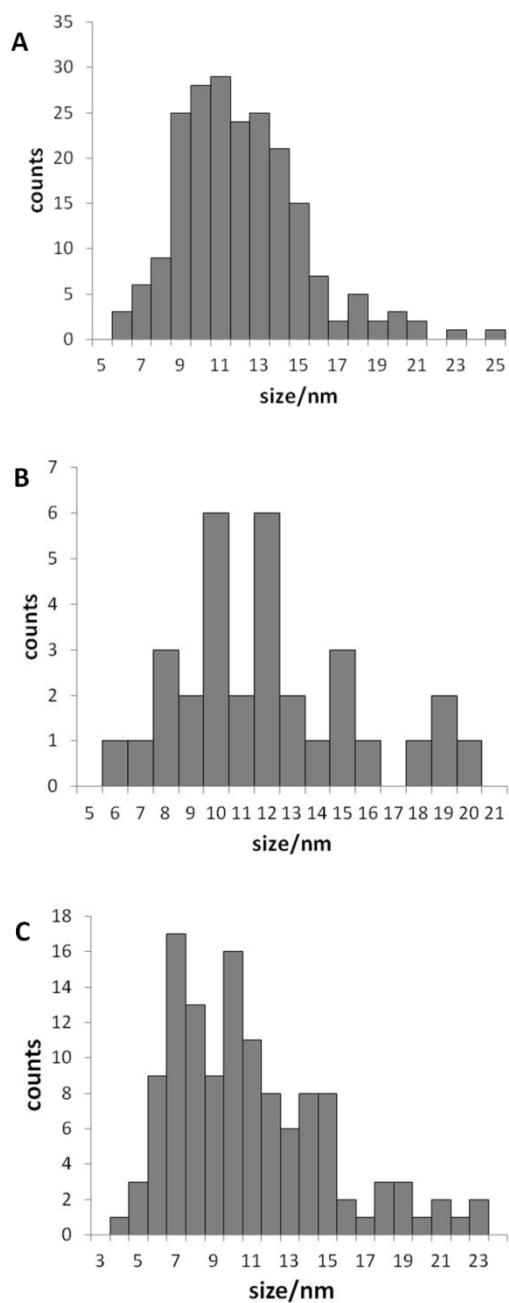

Figure S3: Histograms corresponding to the size distributions (measured in the TEM micrographs) for the GNP from experiment 2 (A), experiment 3 (B) and experiment 4 (C).

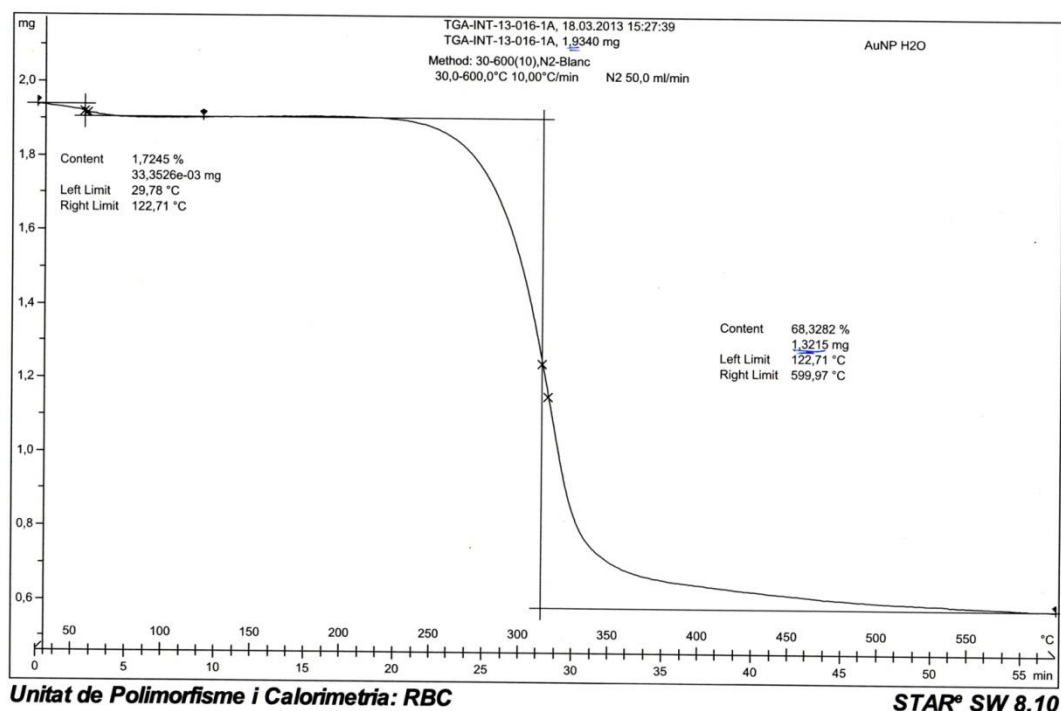

Figure S4 Thermogravimetry curve obtained for the 1·GNP

Table S1

Thermogravimetry results and calculations of amount of ligand per NP and per area of NP surface based on the ratio of ligand to gold present in the GNP and their gold core size obtained by TEM.

| Sample           | Total mass (mg) | Ligand mass (mg) | Ligand: Au (mmol) | Average diameter (nm) | Moles Au/NP            | Ligand/NP | Ligand/nm <sup>2</sup> |
|------------------|-----------------|------------------|-------------------|-----------------------|------------------------|-----------|------------------------|
| <b>1·GNP</b>     | 1.8605          | 1.2861           | 0.62969           | 11.6                  | 8.0x10 <sup>-20</sup>  | 30255     | <b>71.57</b>           |
| GNP <sup>1</sup> | 5.8230          | 3.1521           | 0.32610           | 8.8                   | 3.5 x10 <sup>-20</sup> | 6840      | <b>28.12</b>           |

<sup>1</sup> L. Casal-Dujat, M. Rodrigues, A. Yagüe, A. C. Calpena, D. B. Amabilino, J. González-Linares, M. Borràs and L. Pérez-García, *Langmuir*, 2012, **28**, 2368-2381

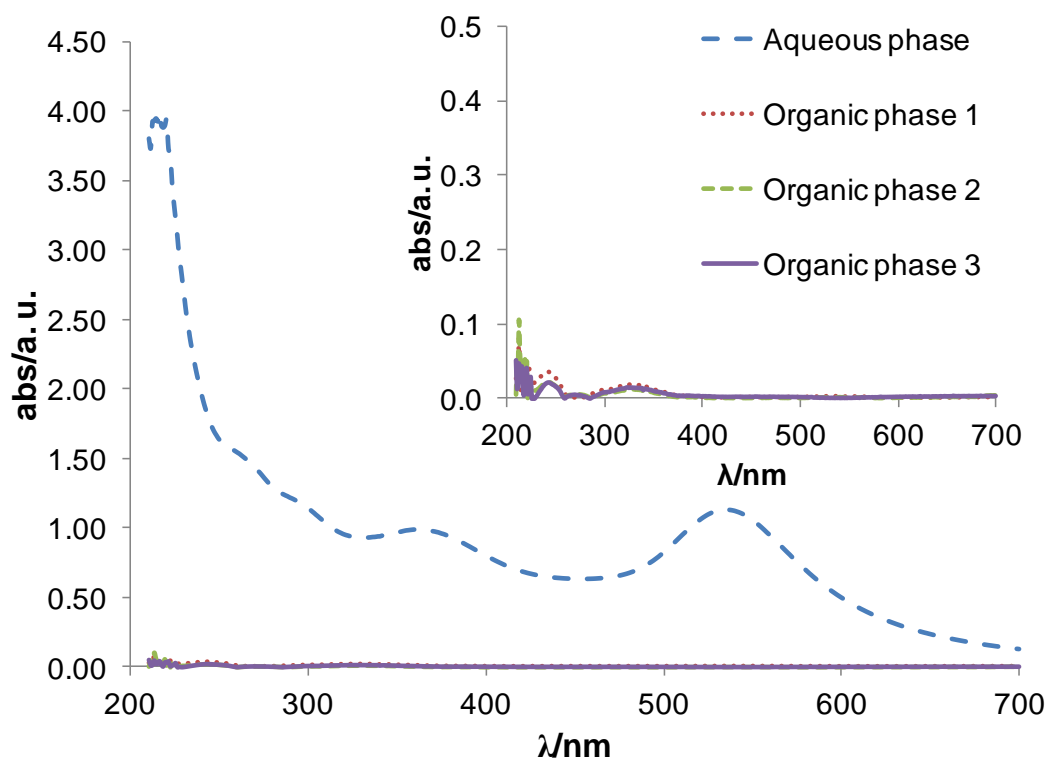

Figure S5: UV/Vis spectrum of the **1•GNP** after extraction of piroxicam, presenting the peak corresponding to piroxicam at 360 nm and the SPR of the GNP, and the organic phases (amplified scale included).

Table S2:

Kinetic models used to fit the data for the release of Piroxicam from **1•GNP**, and the respective AIC parameter

| Kinetic model         | Equation                                  | AIC    |        |
|-----------------------|-------------------------------------------|--------|--------|
|                       |                                           | pH 5.5 | pH 7.4 |
| Zero order            | $Qt/Q_{\infty} = K_0 * t$                 | -77.2  | -95.1  |
| First order           | $Qt/Q_{\infty} = 1 - e^{-K_1 * t}$        | -77.1  | -107.7 |
| One phase exponential | $Qt/Q_{\infty} = 1 + (S/P) * e^{-Kt}$     | -96.1  | -128.2 |
| Higuchi               | $Qt/Q_{\infty} = KH * t^{1/2}$            | -72.1  | -101.4 |
| Weibull               | $Qt/Q_{\infty} = 1 - e^{-(t/td)^{\beta}}$ | -89.0  | -118.0 |
| Korsmeyer-Peppas      | $Qt/Q_{\infty} = K * t^n$                 | -80.7  | -102.0 |

$Q_t$  is the amount of drug released at time  $t$

$Q_{\infty}$  is the total amount of drug released

$Q_t/Q_{\infty}$  is the fraction of drug released at time  $t$

$K$  is the release rate constant

$P$  is the Plateau ( $Q$  at  $t_{\infty}$ ) and  $S$  is the Span (the difference between  $Q_0$  and  $P$ )

$n$  is the diffusion release exponent that could be used to characterize the different release mechanism ( $n \leq 0.43$  (Fickian diffusion),  $0.43 < n < 0.85$  (anomalous transport), and  $\geq 0.85$  (case II transport; i.e. zero order release))

$t_d$  is the time in which the 63.2% of the drug is released and  $\beta$  is the shape parameter

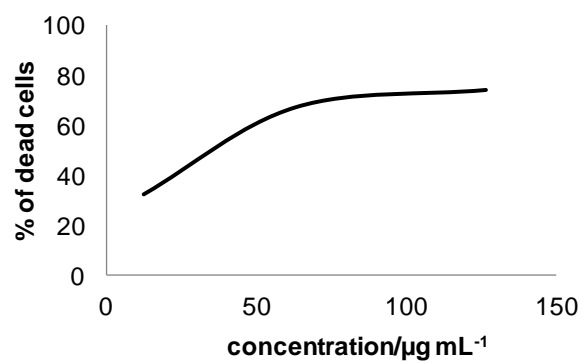

Figure S6: Effect of the **1•GNP** on the viability of Caco-2 cells, by the MTT method.

Table S3:

COX activity in cells exposed to **1•GNP**, **1•GNP** with piroxicam (**1•GNP-pxc**) and **1•GNP** with piroxicam and LPS (**1•GNP-pxc + LPS**). LPS is used to induce inflammation.

|                        | $t_{\text{exposure}}/\text{days}$ | Optical density |        | Activity/ $\text{U}^{\text{a}} \text{mL}^{-1}$ |        | % activity |        |
|------------------------|-----------------------------------|-----------------|--------|------------------------------------------------|--------|------------|--------|
|                        |                                   | COX-total       | COX-II | COX-total                                      | COX-II | COX-I      | COX-II |
| <b>1•GNP</b>           | 1                                 | 0.156           | 0.158  | 9.915                                          | 10.042 | -1.3       | 101.3  |
|                        | 10                                | 0.39            | 0.356  | 24.788                                         | 22.627 |            | 91.3   |
| <b>1•GNP-pxc</b>       | 1                                 | 0.141           | 0.145  | 8.962                                          | 9.216  | -2.8       | 102.8  |
|                        | 10                                | 0.312           | 0.286  | 19.831                                         | 18.178 | 8.3        | 91.7   |
| <b>1•GNP-pxc + LPS</b> | 1                                 | 0.155           | 0.159  | 9.852                                          | 10.106 | -2.6       | 102.6  |
|                        | 3                                 | 0.193           | 0.18   | 12.267                                         | 11.441 | 6.7        | 93.3   |
|                        | 5                                 | 0.271           | 0.271  | 17.225                                         | 17.225 | 0.0        | 100.0  |
|                        | 8                                 | 0.351           | 0.31   | 22.309                                         | 19.703 | 11.7       | 88.3   |
|                        | 10                                | 0.361           | 0.345  | 22.945                                         | 21.928 | 4.4        | 95.6   |

<sup>a</sup>Units of enzymatic activity
